# Supplementary material
Source: publisher figshare collection journal article supplement (https://acs.figshare.com/ndownloader/files/4001170)
Supplement: Supplementary file 1 [file 4001170]

## Sheet: Protein Level Summary
	Protein Level FDR Analysis
	Proteins Identified at Critical False Discovery Rates															Correspondence between FDR Levels and ProteinPilot Reported Confidences
		Number of Proteins Detected															Corresponding ProteinPilot Confidence
	Critical FDR	Local FDR	Global FDR	Global FDR from Fit												Critical FDR	Local FDR	Global FDR	Global FDR from Fit
	0.01															0.01
	0.05															0.05
	0.1															0.1
	* It is recommended you use numbers in bold and avoid using numbers in italics.																Corresponding Unused ProtScore
																Critical FDR	Local FDR	Global FDR	Global FDR from Fit
																0.01
																0.05
																0.1

## Sheet: Distinct Peptide Level Summary
	Distinct Peptide Level FDR Analysis
	Peptides Identified at Critical False Discovery Rates															Correspondence between FDR Levels and ProteinPilot Reported Confidences
		Number of Peptides Identified															Corresponding ProteinPilot Confidence
	Critical FDR	Local FDR	Global FDR	Global FDR from Fit												Critical FDR	Local FDR	Global FDR	Global FDR from Fit
	0.01															0.01
	0.05															0.05
	0.1															0.1
	* It is recommended you use numbers in bold and avoid using numbers in italics.															* It is recommended you use numbers in bold and avoid using numbers in italics.

## Sheet: Spectral Level Summary
	Spectral Level FDR Analysis
	Spectra Identified at Critical False Discovery Rates															Correspondence between FDR Levels and ProteinPilot Reported Confidences
		Number of Spectra Identified															Corresponding ProteinPilot Confidence
	Critical FDR	Local FDR	Global FDR	Global FDR from Fit												Critical FDR	Local FDR	Global FDR	Global FDR from Fit
	0.01															0.01
	0.05															0.05
	0.1															0.1
	* It is recommended you use numbers in bold and avoid using numbers in italics.															* It is recommended you use numbers in bold and avoid using numbers in italics.

## Sheet: Protein Level Data
Protein Level Data	Unused ProtScore Threshold	Confidence Threshold	Forward	Reverse	Correct	Incorrect	Total	Global FDR	q-value	Fit Unused ProtScore Threshold	Fit Confidence Threshold	Fit Forward	Fit Reverse	Fit Correct	Fit Incorrect	Fit Total	Fit Global FDR	Fit Local FDR

## Sheet: Distinct Peptide Level Data
Distinct Peptide Level Data		Confidence Threshold	Forward	Reverse	Correct	Incorrect	Total	Global FDR	q-value		Fit Confidence Threshold	Fit Forward	Fit Reverse	Fit Correct	Fit Incorrect	Fit Total	Fit Global FDR	Fit Local FDR

## Sheet: Spectral Level Data
Spectral Level Data		Confidence Threshold	Forward	Reverse	Correct	Incorrect	Total	Global FDR	q-value		Fit Confidence Threshold	Fit Forward	Fit Reverse	Fit Correct	Fit Incorrect	Fit Total	Fit Global FDR	Fit Local FDR

## Sheet: Single Results Table
	Single Table Summary of All Results
	Data Level	FDR Type	FDR	ID Yield			Template Version
Identification Yield at FDR Threshold	Protein	Local	0.01
	Protein		0.05				1.03
	Protein		0.1
	Protein	Global	0.01
	Protein		0.05
	Protein		0.1
	Distinct peptide	Local	0.01
	Distinct peptide		0.05
	Distinct peptide		0.1
	Distinct peptide	Global	0.01
	Distinct peptide		0.05
	Distinct peptide		0.1
	Spectral	Local	0.01
	Spectral		0.05
	Spectral		0.1
	Spectral	Global	0.01
	Spectral		0.05
	Spectral		0.1
Corresponding Confidence in ProteinPilot™ Software	Protein	Local	0.01
	Protein		0.05
	Protein		0.1
	Protein	Global	0.01
	Protein		0.05
	Protein		0.1
	Distinct peptide	Local	0.01
	Distinct peptide		0.05
	Distinct peptide		0.1
	Distinct peptide	Global	0.01
	Distinct peptide		0.05
	Distinct peptide		0.1
	Spectral	Local	0.01
	Spectral		0.05
	Spectral		0.1
	Spectral	Global	0.01
	Spectral		0.05
	Spectral		0.1
